# Supplementary material for: CoGe LoadExp+: A web‐based suite that integrates next‐generation sequencing data analysis workflows and visualization
Source: PubMed Central journal article supplement (PMC6508507; doi:10.1002/pld3.8), 2017-07-20
Supplement: PLD3-1-0-s002.pdf [file PLD3-1-0-s002.pdf]

# CoGe LoadExp+: A web-based suite that integrates next-gen sequencing data analysis workflows and visualization

Jeffrey W. Grover, Matthew Bomhoff, Sean Davey, Brian D. Gregory, Rebecca A. Mosher, and Eric Lyons

## Supplementary Information

The screenshot displays the CoGe LoadExp+ web interface. At the top, there is a search bar and navigation links for 'My Data', 'Tools', and 'Help'. Below the search bar, the 'Notebooks' section is active, showing a list of 20 notebooks. The notebooks are organized into a table with columns for 'Name' and 'Date added'. The notebook 'wierzbicki\_bismark\_col-0\_benchmarking' is highlighted in green. A red arrow points to the 'Groups with access' section of the notebook details on the right, which lists 'Eric Lyons (elyons)', 'Jeffrey Grover (groverj3)', and 'Rebecca Mosher (rmosher)'. The 'Tools' section includes 'Edit' and 'Share' options.

| Name                                                                                                                                                                                 | Date added |
|--------------------------------------------------------------------------------------------------------------------------------------------------------------------------------------|------------|
| hsapiens_brain1_maseq_tophat2_ruiz: Benchmarking the maseq pipeline with data from Ruiz-Orera et al. 2015 (Experiment)                                                               | Oct 12     |
| hsapiens_brain1_maseq_hisat2_ruiz: Benchmarking the maseq pipeline with data from Ruiz-Orera et al. 2015 (Experiment)                                                                | Oct 11     |
| hsapiens_brain1_maseq_bowtie2_ruiz: Benchmarking the maseq pipeline with data from Ruiz-Orera et al. 2015 (Experiment)                                                               | Oct 6      |
| b73_maseq_hisat2_walley: Benchmarking the maseq pipeline with data from Walley et al. 2016 (Experiment)                                                                              | Oct 3      |
| hsapiens_brain1_maseq_gsnap_ruiz: Benchmarking the maseq pipeline with data from Ruiz-Orera et al. 2015 (Experiment)                                                                 | Oct 1      |
| b73_leaf8_tophat2_walley: Benchmarking the maseq pipeline with data from Walley et al. 2016 (Experiment)                                                                             | Sep 29     |
| b73_leaf8_bowtie2_walley: Benchmarking the maseq pipeline with data from Walley et al. 2016 (Experiment)                                                                             | Sep 29     |
| b73_leaf8_gsnap_walley: Benchmarking the maseq pipeline with data from Walley et al. 2016 (Experiment)                                                                               | Sep 29     |
| col-0_maseq_hisat2_deleris: Benchmarking the maseq pipeline with data from Deleris et al. 2012 (Experiment)                                                                          | Sep 28     |
| col-0_maseq_tophat2_deleris: Benchmarking the maseq pipeline with data from Deleris et al. 2012 (Experiment)                                                                         | Sep 28     |
| col-0_maseq_bowtie2_deleris: Benchmarking the maseq pipeline with data from Deleris et al. 2012 (Experiment)                                                                         | Sep 28     |
| col-0_maseq_gsnap_deleris: Benchmarking the maseq pipeline with data from Deleris et al. 2012 (Experiment)                                                                           | Sep 28     |
| lister_h1-esc_bwameth_benchmarking: Running the Lister et al. 2009 h1 esc data through the bwameth pipeline for benchmarking (Experiment)                                            | Sep 22     |
| lister_h1-esc_bismark_benchmarking: Running the Lister et al. 2009 h1 esc data through the bismark pipeline for benchmarking (Experiment)                                            | Sep 21     |
| regulski_b73_maize_bwameth_benchmarking: Running the Regulski maize b73 methylation dataset through the bwameth pipeline for benchmarking purposes (Experiment)                      | Sep 5      |
| Favorites: This notebook contains genomes you have marked as favorites. It is created automatically by CoGe. (Mixed)                                                                 | Aug 21     |
| regulski_b73_maize_bismark_benchmarking: Running the Regulski maize b73 methylation dataset through the Bismark pipeline for benchmarking purposes. (Experiment)                     | Aug 20     |
| wierzbicki_bismark_col-0_benchmarking: Running the Wierzbicki 2012 dataset through the bismark pipeline for benchmarking purposes on the new server. Using -N 1 option. (Experiment) | Aug 18     |
| wierzbicki_bwameth_col-0_benchmarking: Running the Wierzbicki 2012 dataset through the bwameth pipeline for benchmarking purposes on the new server. (Experiment)                    | Aug 18     |
| wierzbicki_bismark_col-0_benchmarking: Benchmarking Bismark workflow with data from Wierzbicki et al. 2012 (Experiment)                                                              | Aug 17     |

**Figure S1. Data Can Be Organized Into Notebooks.** Individual experiment files may be organized into one notebook. This aids in data management, allowing related datasets from LoadExp+ workflows to be grouped together and privately shared with other users or made fully public. The highlighted notebook has been shared with other users (red arrow).

☆  **wierzbicki\_bismark\_col-0\_benchmarking: Benchmarking Bismark workflow with data from Wierzbicki et al. 2012 (id1616)**

## Info

ID: 1616  
 Name: wierzbicki\_bismark\_col-0\_benchmarking  
 Description: Benchmarking Bismark workflow with data from Wierzbicki et al. 2012-  
 Type: Experiment  
 Note:  
 Restricted: Yes  
 Creation: Jeffrey Grover 2016-08-17 15:03:28  
 Owner: Jeffrey Grover  
 Users with access: Eric Lyons, Jeffrey Grover, Rebecca Mosher

## Metadata

There are no additional metadata items for this notebook.

+ Add

Edit Info

Make Public

Delete

Browse

## Contents

| Type           | Name                                                                                                                                                                                                                                                                              | Date                | Remove                                                                              |
|----------------|-----------------------------------------------------------------------------------------------------------------------------------------------------------------------------------------------------------------------------------------------------------------------------------|---------------------|-------------------------------------------------------------------------------------|
| Experiments 4: |  wierzbicki_bismark_col-0_benchmarking (BAM alignment): Running (v1.0, id8568): NCBI-SRA                                                                                                         | 2016-08-17 15:00:50 |  |
|                |  wierzbicki_bismark_col-0_benchmarking (CHG methylation): Running the Wierzbicki 2012 dataset through the Bismark pipeline for benchmarking purposes on the new server. (v1.0, id8567): NCBI-SRA | 2016-08-17 14:58:27 |  |
|                |  wierzbicki_bismark_col-0_benchmarking (CHH methylation): Running the Wierzbicki 2012 dataset through the Bismark pipeline for benchmarking purposes on the new server. (v1.0, id8569): NCBI-SRA | 2016-08-17 15:03:23 |  |
|                |  wierzbicki_bismark_col-0_benchmarking (CpG methylation): Running the Wierzbicki 2012 dataset through the Bismark pipeline for benchmarking purposes on the new server. (v1.0, id8566): NCBI-SRA | 2016-08-17 14:58:24 |  |

+ Add

Send contents to:

Go 

**Figure S2. Notebooks Can Contain Many Experiment Files.** Output files from LoadExp+ BS-seq workflows are visible inside one notebook. Clicking on the individual experiments will open them in Experiment View (Figure S4). This notebook has been shared with other users (red arrow) but otherwise is private ('Restricted: Yes').

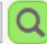

NEW

Experiments 107

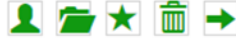

Search

My Data

Genomes

Experiments

Notebooks

Shared with me

Favorites

Metadata

User Groups

Activity

Analyses

Data loading

Trash

| Name                                                                                         | Date added |
|----------------------------------------------------------------------------------------------|------------|
| hsapiens_brain1_maseq_tophat2_ruiz (read depth): Read depth per position (v1.0, id9001)      | Oct 12     |
| hsapiens_brain1_maseq_tophat2_ruiz (FPKM): Transcript expression measurements (v1.0, id9000) | Oct 12     |
| hsapiens_brain1_maseq_tophat2_ruiz (BAM alignment): Benchmarking (v1.0, id8999)              | Oct 11     |
| hsapiens_brain1_maseq_hisat2_ruiz (read depth): Read depth per position (v1.0, id8997)       | Oct 11     |
| hsapiens_brain1_maseq_hisat2_ruiz (FPKM): Transcript expression measurements (v1.0, id8998)  | Oct 11     |
| hsapiens_brain1_maseq_hisat2_ruiz (BAM alignment): Benchmarking (v1.0, id8996)               | Oct 11     |
| hsapiens_brain1_maseq_bowtie2_ruiz (FPKM): Transcript expression measurements (v1.0, id8983) | Oct 6      |
| hsapiens_brain1_maseq_bowtie2_ruiz (BAM alignment): Benchmarking (v1.0, id8982)              | Oct 6      |
| hsapiens_brain1_maseq_bowtie2_ruiz (read depth): Read depth per position (v1.0, id8981)      | Oct 6      |
| b73_maseq_hisat2_walley (FPKM): Transcript expression measurements (v1.0, id8903)            | Oct 3      |
| b73_maseq_hisat2_walley (BAM alignment): Benchmarking (v1.0, id8901)                         | Oct 3      |
| b73_maseq_hisat2_walley (read depth): Read depth per position (v1.0, id8902)                 | Oct 3      |
| hsapiens_brain1_maseq_bowtie2_ruiz (read depth): Read depth per position (v1.0, id8894)      | Oct 2      |
| hsapiens_brain1_maseq_bowtie2_ruiz (FPKM): Transcript expression measurements (v1.0, id8895) | Oct 2      |
| hsapiens_brain1_maseq_bowtie2_ruiz (BAM alignment): Benchmarking (v1.0, id8893)              | Oct 2      |
| hsapiens_brain1_maseq_gsnap_ruiz (FPKM): Transcript expression measurements (v1.0, id8892)   | Oct 1      |
| hsapiens_brain1_maseq_gsnap_ruiz (read depth): Read depth per position (v1.0, id8891)        | Oct 1      |
| hsapiens_brain1_maseq_gsnap_ruiz (BAM alignment): Benchmarking (v1.0, id8890)                | Oct 1      |
| b73_maseq_hisat2_walley (read depth): Read depth per position (v1.0, id8889)                 | Sep 30     |
| b73_maseq_hisat2_walley (BAM alignment): Benchmarking (v1.0, id8887)                         | Sep 30     |

3 items selected.

Click an action icon at the top to share, organize, delete, or analyze.

**Figure S3. LoadExp+ Output Files Are Seen As Separate Experiments.** Once analyses have finished a full listing of output files from any workflows that have run are visible in the user's My Data page. The three highlighted experiments (red arrow) were generated from the same LoadExp+ RNAseq run where each intermediate file of an analysis (BAM, read depth, and transcript quantification) have automatically been integrated.

☆  **wierzbicki\_bismark\_col-0\_benchmarking (CHH methylation): Running the Wierzbicki 2012 dataset through the Bismark pipeline for benchmarking p...**

### Info

**ID:** 8569  
**Name:** wierzbicki\_bismark\_col-0\_benchmarking (CHH methylation)  
**Description:** Running the Wierzbicki 2012 dataset through the Bismark pipeline for benchmarking purposes on the new server.  
**Data Type:** Quantitative  
**Genome:** Arabidopsis thaliana Col-0 (thale cress) (v10.02, id16911): unmasked  
**Source:** NCBI-SRA  
**Version:** 1.0  
**Tags:**  
**Notebooks:** wierzbicki\_bismark\_col-0\_benchmarking  
**Restricted:** Yes  
**Creation:** Jeffrey Grover 2016-08-17 15:03:23  
**Owner:** Jeffrey Grover  
**Users with access:** Eric Lyons, Jeffrey Grover,  Becca Mosher

### Statistics

**Items:** 8,651,576  
**Data size:** 981,506,932 bytes

### Tools

Export data to: [Download](#) | [CyVerse Data Store](#) 

[Edit Info](#)
[Add Tag](#)
[Make Public](#)
[Browse](#) 

### Metadata

**note:** [Generated by CoGe's Methylation Analysis Pipeline](#) [Link](#)  
 deduplicate\_bismark -s  
 bismark\_methylation\_extractor --ignore 0 --ignore\_3prime 0  
 SRA Accession: SRA054962, SRX156068    
 Source: Wierzbicki et al. 2012 [Link](#)    
 Arabidopsis thaliana, Col-0  

[Add](#)

**Figure S4. Experiment View.** Detailed information about each output file from LoadExp+ is visible by opening that file in Experiment View. Data can also be exported for direct download or to the CyVerse Data Store (purple arrow). The experiment can be made public by clicking the “Make Public” button. User-defined metadata such as the “Name” and “Description” are visible (black arrow) and may be changed by clicking “Edit Info.” Run-time options are captured in the “Metadata” section (red arrow) and these are immutable by the user, but additional metadata may be added in the form of text, links, and images. The “Browse” button (blue arrow) will open the experiment for viewing in the EPIC-CoGe browser.

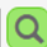

NEW

Notebooks 20

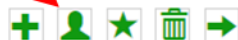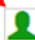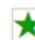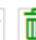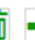

Search

My Data

Genomes

Experiments

Notebooks

Shared with me

Favorites

Metadata

User Groups

Activity

Analyses

Data loading

Trash

| Name                                                                                                                                                              | Date added |
|-------------------------------------------------------------------------------------------------------------------------------------------------------------------|------------|
| hsapiens_brain1_maseq_gsnap_ruiz: Benchmarking the maseq pipeline with data from Ruiz-Orera et al. 2015 (Experiment)                                              | Oct 1      |
| b73_leaf8_tophat2_walley: Benchmarking the maseq pipeline with data from Walley et al. 2016 (Experiment)                                                          | Sep 29     |
| b73_leaf8_bowtie2_walley: Benchmarking the maseq pipeline with data from Walley et al. 2016 (Experiment)                                                          | Sep 29     |
| b73_leaf8_gsnap_walley: Benchmarking the maseq pipeline with data from Walley et al. 2016 (Experiment)                                                            | Sep 29     |
| col-0_maseq_hisat2_deleris: Benchmarking the maseq pipeline with data from Deleris et al. 2016 (Experiment)                                                       | Sep 28     |
| col-0_maseq_tophat2_deleris: Benchmarking the maseq pipeline with data from Deleris et al. 2016 (Experiment)                                                      | Sep 28     |
| col-0_maseq_bowtie2_deleris: Benchmarking the maseq pipeline with data from Deleris et al. 2016 (Experiment)                                                      | Sep 28     |
| col-0_maseq_gsnap_deleris: Benchmarking the maseq pipeline with data from Deleris et al. 2016 (Experiment)                                                        | Sep 28     |
| lister_h1-esc_bwameth_benchmarking (Experiment)                                                                                                                   | Sep 22     |
| lister_h1-esc_bismark_benchmarking (Experiment)                                                                                                                   | Sep 21     |
| regulski_b73_maize_bwameth_pipeline for benchmarking purposes on the new server. (Experiment)                                                                     | Sep 5      |
| Favorites: This notebook contains...                                                                                                                              |            |
| regulski_b73_maize_bismark_pipeline for benchmarking purposes on the new server. (Experiment)                                                                     | Aug 21     |
| wierzbicki_bismark_col-0_benchmarking purposes on the new server. (Experiment)                                                                                    | Aug 20     |
| wierzbicki_bwameth_col-0_benchmarking: Running the Wierzbicki 2012 dataset through the bwameth pipeline for benchmarking purposes on the new server. (Experiment) | Aug 18     |
| wierzbicki_bwameth_col-0_benchmarking: Running the Wierzbicki 2012 dataset through the bwameth pipeline for benchmarking purposes on the new server. (Experiment) | Aug 18     |
| wierzbicki_bismark_col-0_benchmarking: Benchmarking Bismark workflow with data from Wierzbicki et al. 2012 (Experiment)                                           | Aug 17     |

## Share Items

## Who Has Access

- Eric Lyons (elyons) - Reader \*
- Jeffrey Grover (groverj3) - Owner
- Rebecca Mosher (rmosher) - Reader \*

## Add Access

Enter user or group names:

Add

Or make available to everyone:

Make Public

## Notebook id1616

Name: wierzbicki\_bismark\_col-0\_benchmarking

Description: Benchmarking Bismark workflow with data from Wierzbicki et al. 2012

## Contents:

Experiments: 4

## Groups with access:

None

## Users with access:

Eric Lyons (elyons)  
Jeffrey Grover (groverj3)  
Rebecca Mosher (rmosher)

## Tools:

Edit  
Share

**Figure S5. Sharing Data Within CoGe.** Whole notebooks or individual experiment files can be shared with collaborators by clicking the “share” button on the right side of the My Data page or the button above the listing of notebooks (red arrow). Typing in a user name will allow searching through all of CoGe’s users. Additionally, data can be made public and viewable by all users from this area as well.

| Data Size                             | Aligner | Source Data                                                                  | Organism (Genome ID)                | Run Time                            | Options                                                                                                                                                                      |
|---------------------------------------|---------|------------------------------------------------------------------------------|-------------------------------------|-------------------------------------|------------------------------------------------------------------------------------------------------------------------------------------------------------------------------|
| 29,752,004 reads<br>1.66 GB (gzipped) | GSNAP   | (Deleris <i>et al.</i> , 2012)<br>(WT Col-0)<br>SRR3709924                   | <i>Arabidopsis thaliana</i> (16911) | 36 minutes, 37.57 seconds           | Single-ended, phred33, CutAdapt: -q 25 -m 17<br>GSNAP: -N 1, -n 5, -Q -gap-mode none -nofails<br>Expression Analysis: enable, -q 20, -frag-bias-correct, -multi-read-correct |
| 29,752,004 reads<br>1.66 GB (gzipped) | Bowtie2 | (Deleris <i>et al.</i> , 2012)<br>(WT Col-0)<br>SRR3709924                   | <i>Arabidopsis thaliana</i> (16911) | 1 hour, 58 minutes, 22.02 seconds   | Single-ended, phred33, CutAdapt: -q 25 -m 17<br>Bowtie2: default options<br>Expression Analysis: enable, -q 20, -frag-bias-correct, -multi-read-correct                      |
| 29,752,004 reads<br>1.66 GB (gzipped) | TopHat2 | (Deleris <i>et al.</i> , 2012)<br>(WT Col-0)<br>SRR3709924                   | <i>Arabidopsis thaliana</i> (16911) | 1 hour, 6 minutes, 58.08 seconds    | Single-ended, phred33, CutAdapt: -q 25 -m 17<br>TopHat2: -g 1<br>Expression Analysis: enable, -q 20, -frag-bias-correct, -multi-read-correct                                 |
| 29,752,004 reads<br>1.66 GB (gzipped) | HiSat2  | (Deleris <i>et al.</i> , 2012)<br>(WT Col-0)<br>SRR3709924                   | <i>Arabidopsis thaliana</i> (16911) | 47 minutes, 33.30 seconds           | Single-ended, phred33, CutAdapt: -q 25 -m 17<br>HISAT2: default options<br>Expression Analysis: enable, -q 20, -frag-bias-correct, -multi-read-correct                       |
| 20,434,594 reads<br>1.74 GB (gzipped) | GSNAP   | (Walley <i>et al.</i> , 2016)<br>( <i>Zea mays</i> b73, leaf 8)<br>SRR957442 | <i>Zea mays</i> (25317)             | 45 minutes, 17.21 seconds           | Single-ended, phred33, CutAdapt: -q 25 -m 17<br>GSNAP: -N 1, -n 5, -Q -gap-mode none -nofails<br>Expression Analysis: enable, -q 20, -frag-bias-correct, -multi-read-correct |
| 20,434,594 reads<br>1.74 GB (gzipped) | Bowtie2 | (Walley <i>et al.</i> , 2016)<br>( <i>Zea mays</i> b73, leaf 8)<br>SRR957442 | <i>Zea mays</i> (25317)             | 1 hour, 29 minutes, 55.87 seconds   | Single-ended, phred33, CutAdapt: -q 25 -m 17<br>Bowtie2: default options<br>Expression Analysis: enable, -q 20, -frag-bias-correct, -multi-read-correct                      |
| 20,434,594 reads<br>1.74 GB (gzipped) | TopHat2 | (Walley <i>et al.</i> , 2016)<br>( <i>Zea mays</i> b73, leaf 8)<br>SRR957442 | <i>Zea mays</i> (25317)             | 1 hour, 15 minutes, 28.34 seconds   | Single-ended, phred33, CutAdapt: -q 25 -m 17<br>TopHat2: -g 1<br>Expression Analysis: enable, -q 20, -frag-bias-correct, -multi-read-correct                                 |
| 20,434,594 reads<br>1.74 GB (gzipped) | HiSat2  | (Walley <i>et al.</i> , 2016)<br>( <i>Zea mays</i> b73, leaf 8)<br>SRR957442 | <i>Zea mays</i> (25317)             | 42 minutes, 59.59 seconds           | Single-ended, phred33, CutAdapt: -q 25 -m 17<br>HISAT2: default options<br>Expression Analysis: enable, -q 20                                                                |
| 73,730,964 reads<br>9.91 GB (gzipped) | GSNAP   | (Ruiz-Orera <i>et al.</i> , 2015)<br>(brain1)<br>SRR2040575                  | <i>Homo sapiens</i> (25747)         | 3 hours, 22 minutes, 12.54 seconds  | Paired end, phred33, CutAdapt: -q 25 -m 17<br>GSNAP: -N 1, -n 5, -Q -gap-mode none -nofails<br>Expression Analysis: enable, -q 20, -frag-bias-correct, -multi-read-correct   |
| 73,730,964 reads<br>9.91 GB (gzipped) | Bowtie2 | (Ruiz-Orera <i>et al.</i> , 2015)<br>(brain1)<br>SRR2040575                  | <i>Homo sapiens</i> (25747)         | 14 hours, 13 minutes, 59.75 seconds | Paired end, phred33, CutAdapt: -q 25 -m 17<br>Bowtie2: default options<br>Expression Analysis: enable, -q 20, -frag-bias-correct, -multi-read-correct                        |
| 73,730,964 reads<br>9.91 GB (gzipped) | TopHat2 | (Ruiz-Orera <i>et al.</i> , 2015)<br>(brain1)<br>SRR2040575                  | <i>Homo sapiens</i> (25747)         | 11 hours, 35 minutes, 55.21 seconds | Single-ended, phred33, CutAdapt: -q 25 -m 17<br>TopHat2: -g 1<br>Expression Analysis: enable, -q 20, -frag-bias-correct, -multi-read-correct                                 |
| 73,730,964 reads<br>9.91 GB (gzipped) | HiSat2  | (Ruiz-Orera <i>et al.</i> , 2015)<br>(brain1)<br>SRR2040575                  | <i>Homo sapiens</i> (25747)         | 6 hours, 25 minutes, 5.96 seconds   | Paired end, phred33, CutAdapt: -q 25 -m 17<br>HISAT2: default options<br>Expression Analysis: enable, -q 20                                                                  |

**Table S1. RNAseq Workflow Benchmarking Information.** All aligners calculate FPKM with Cufflinks and read depth with SAMtools. All options selected are based on default values at the time of publication. Genome ID is assigned upon upload to CoGe and is searchable. Run times are dependent on server load and may vary.



| Data Size                                 | Aligner | Source Data                                                                                  | Organism (Genome ID)           | Run Time                            | Options                                                                                                                                                                       |
|-------------------------------------------|---------|----------------------------------------------------------------------------------------------|--------------------------------|-------------------------------------|-------------------------------------------------------------------------------------------------------------------------------------------------------------------------------|
| 93,770,828 reads<br>13.28 GB<br>(gzipped) | GSNAP   | (Sutinen <i>et al.</i> , 2014)<br>Input: SRR923516<br>Rep 1: SRR1118386<br>Rep 2: SRR1118387 | <i>Homo sapiens</i><br>(25747) | 7 hours, 54 minutes,<br>43 seconds  | Single-ended, phred33, CutAdapt: -q 25 -m 17<br>GSNAP: -N 1, -n 5, -Q -gap-mode none -nofails<br>ChIP-seq Analysis: -size 250 -gsize 3000000000 -norm 10000000 -fdr 0.01 -F 3 |
| 93,770,828 reads<br>13.28 GB<br>(gzipped) | Bowtie2 | (Sutinen <i>et al.</i> , 2014)<br>Input: SRR923516<br>Rep 1: SRR1118386<br>Rep 2: SRR1118387 | <i>Homo sapiens</i><br>(25747) | 14 hours, 10<br>minutes, 30 seconds | Single-ended, phred33, CutAdapt: -q 25 -m 17<br>Bowtie2: default options<br>ChIP-seq Analysis: -size 250 -gsize 3000000000 -norm 10000000 -fdr 0.01 -F 3                      |
| 93,770,828 reads<br>13.28 GB<br>(gzipped) | TopHat  | (Sutinen <i>et al.</i> , 2014)<br>Input: SRR923516<br>Rep 1: SRR1118386<br>Rep 2: SRR1118387 | <i>Homo sapiens</i><br>(25747) | 28 hours, 21<br>minutes, 47 seconds | Single-ended, phred33, CutAdapt: -q 25 -m 17<br>TopHat2: -g 1<br>ChIP-seq Analysis: -size 250 -gsize 3000000000 -norm 10000000 -fdr 0.01 -F 3                                 |
| 93,770,828 reads<br>13.28 GB<br>(gzipped) | HISAT2  | (Sutinen <i>et al.</i> , 2014)<br>Input: SRR923516<br>Rep 1: SRR1118386<br>Rep 2: SRR1118387 | <i>Homo sapiens</i><br>(25747) | 5 hours, 37 minutes,<br>43 seconds  | Single-ended, phred33, CutAdapt: -q 25 -m 17<br>HISAT2: default options<br>ChIP-seq Analysis: -size 250 -gsize 3000000000 -norm 10000000 -fdr 0.01 -F 3                       |

**Table S2. ChIPseq Analysis Benchmarking Information.** All options selected are based on default values at the time of publication. Run times are dependent on server load and may vary.

| Data Size                                  | Analysis Tool | Source Data                                                             | Organism (Genome ID)                   | Run Time                                  | Options                                                                                                              |
|--------------------------------------------|---------------|-------------------------------------------------------------------------|----------------------------------------|-------------------------------------------|----------------------------------------------------------------------------------------------------------------------|
| 41,408,716 reads<br>2.05 GB (gzipped)      | Bismark       | (Wierzbicki <i>et al.</i> , 2012)<br>(Col-0 ecotype)<br>SRX156068       | <i>Arabidopsis thaliana</i><br>(16911) | 1 hour, 54 minutes,<br>59.73 seconds      | Single-ended, phred33, Trim Galore: -q 20 --length 20,<br>Bismark: -N 0 -L 20, Deduplicate, Minimum Coverage: 5      |
| 41,408,716 reads<br>2.05 GB (gzipped)      | bwameth       | (Wierzbicki <i>et al.</i> , 2012)<br>(Col-0 ecotype)<br>SRX156068       | <i>Arabidopsis thaliana</i><br>(16911) | 1 hour, 11 minutes,<br>0.45 seconds       | Single-ended, phred33, Trim Galore: -q 20 --length 20,<br>bwameth: Default options, Deduplicate, Minimum Coverage: 5 |
| 303,269,187 reads<br>24.99 GB<br>(gzipped) | Bismark       | (Regulski <i>et al.</i> , 2013)<br>(b73 variety)<br>SRX159573           | <i>Zea mays</i><br>(25317)             | 30 hours, 59<br>minutes, 30.63<br>seconds | Paired end, phred33, Trim Galore: -q 20 --length 20,<br>Bismark: -N 0 -L 20, Deduplicate, Minimum Coverage: 5        |
| 303,269,187 reads<br>24.99 GB<br>(gzipped) | bwameth       | (Regulski <i>et al.</i> , 2013)<br>(b73 variety)<br>SRX159573           | <i>Zea mays</i><br>(25317)             | 53 hours, 56<br>minutes, 36.16<br>seconds | Paired end, phred33, Trim Galore: -q 20 --length 20,<br>bwameth: Default options, Deduplicate, Minimum Coverage: 5   |
| 570,423,799 reads<br>43.12 GB<br>(gzipped) | Bismark       | (Lister <i>et al.</i> , 2009)<br>(H1 embryonic stem cells)<br>SRX006239 | <i>Homo sapiens</i><br>(25747)         | 42 hours, 19<br>minutes, 13.70<br>seconds | Single-ended, phred33, Trim Galore: -q 20 --length 20,<br>Bismark: -N 0 -L 20, Deduplicate, Minimum Coverage: 5      |
| 570,423,799 reads<br>43.12 GB<br>(gzipped) | bwameth       | (Lister <i>et al.</i> , 2009)<br>(H1 embryonic stem cells)<br>SRX006239 | <i>Homo sapiens</i><br>(25747)         | 22 hours, 15<br>minutes, 55.87<br>seconds | Single-ended, phred33, Trim Galore: -q 20 --length 20,<br>bwameth: Default options, Deduplicate, Minimum Coverage: 5 |

**Table S3. Bisulfite Sequencing Workflow Benchmarking Information.** Bismark runs in Bowtie2 mode. All options selected are based on default values at the time of publication with the exception of deduplication. Run times are dependent on server load and may vary.



## References

- Deleris,A. *et al.* (2012) Loss of the DNA Methyltransferase MET1 Induces H3K9 Hypermethylation at PcG Target Genes and Redistribution of H3K27 Trimethylation to Transposons in *Arabidopsis thaliana*. *PLoS Genet.*, **8**.
- Heinz,S. *et al.* (2010) Simple Combinations of Lineage-Determining Transcription Factors Prime cis-Regulatory Elements Required for Macrophage and B Cell Identities. *Mol. Cell*, **38**, 576–589.
- Kim,D. *et al.* (2015) HISAT: a fast spliced aligner with low memory requirements. *Nat. Methods*, **12**, 357–360.
- Kim,D. *et al.* (2013) TopHat2: accurate alignment of transcriptomes in the presence of insertions, deletions and gene fusions. *Genome Biol.*, **14**, R36.
- Krueger,F. and Andrews,S.R. (2011) Bismark: a flexible aligner and methylation caller for Bisulfite-Seq applications. *Bioinformatics*, **27**, 1571–1572.
- Langmead,B. *et al.* (2009) Ultrafast and memory-efficient alignment of short DNA sequences to the human genome. *Genome Biol.*, **10**, R25.
- Li,H. *et al.* (2009) The Sequence Alignment/Map format and SAMtools. *Bioinformatics*, **25**, 2078–2079.
- Lister,R. *et al.* (2009) Human DNA methylomes at base resolution show widespread epigenomic differences. *Nature*, **462**, 315–322.
- Martin,M. (2011) Cutadapt removes adapter sequences from high-throughput sequencing reads. *EMBnet.journal*, **17**, 10.
- McKenna, A. *et al.* (2010) The Genome Analysis Toolkit: a MapReduce framework for analyzing next-generation DNA sequencing data. *Genome Res.*, **20**, 1297-1303.
- Pedersen,B.S. *et al.* (2014) Fast and accurate alignment of long bisulfite-seq reads. *arXiv Prepr.*, 1–2.
- Regulski,M. *et al.* (2013) The maize methylome influences mRNA splice sites and reveals widespread paramutation-like switches guided by small RNA. *Genome Res.*, **23**, 1651–1662.
- Rimmer,A. *et al.* (2014) Integrating mapping-, assembly- and haplotype-based approaches for calling variants in clinical sequencing applications. *Nat. Genet.*, **46**, 912–918.
- Ruiz-Orera,J. *et al.* (2015) Origins of De Novo Genes in Human and Chimpanzee. *PLoS Genet.*, **11**, 1–24.
- Sutinen,P. *et al.* (2014) SUMOylation modulates the transcriptional activity of androgen receptor in a target gene and pathway selective manner. *Nucleic Acids Res.*, **42**, 8310–8319.
- Trapnell,C. *et al.* (2010) Transcript assembly and quantification by RNA-Seq reveals unannotated transcripts and isoform switching during cell differentiation. *Nat. Biotechnol.*, **28**, 511–515.
- Walley,J.W. *et al.* (2016) Integration of omic networks in a developmental atlas of maize. *Science (80-. )*, **353**, 814–818.
- Wierzbicki,A.T. *et al.* (2012) Spatial and functional relationships among Pol V-associated loci, Pol IV-dependent siRNAs, and cytosine methylation in the *Arabidopsis* epigenome. *Genes Dev.*, **26**, 1825–1836.
- Wu,T.D. and Nacu,S. (2010) Fast and SNP-tolerant detection of complex variants and splicing in short reads. *Bioinformatics*, **26**, 873–881.
